# Supplementary material for: Hybrid photoactive materials from municipal sewage sludge for the photocatalytic degradation of methylene blue
Source: Royal Society of Chemistry journal article supplement (doi:10.1039/c1gc15644f), 2011-01-01
Supplement: c1gc15644f.pdf [file c1gc15644f.pdf]

## SUPPLEMENTARY MATERIAL

### Hybrid Photoactive Materials from Municipal Sewage Sludge for the Photocatalytic Degradation of Methylene Blue

Juan Matos,<sup>\*a</sup> Maibelin Rosales,<sup>a</sup> Andreína García,<sup>a</sup> Cesar Nieto-Delgado,<sup>b</sup> José R. Rangel-Mendez<sup>b</sup>

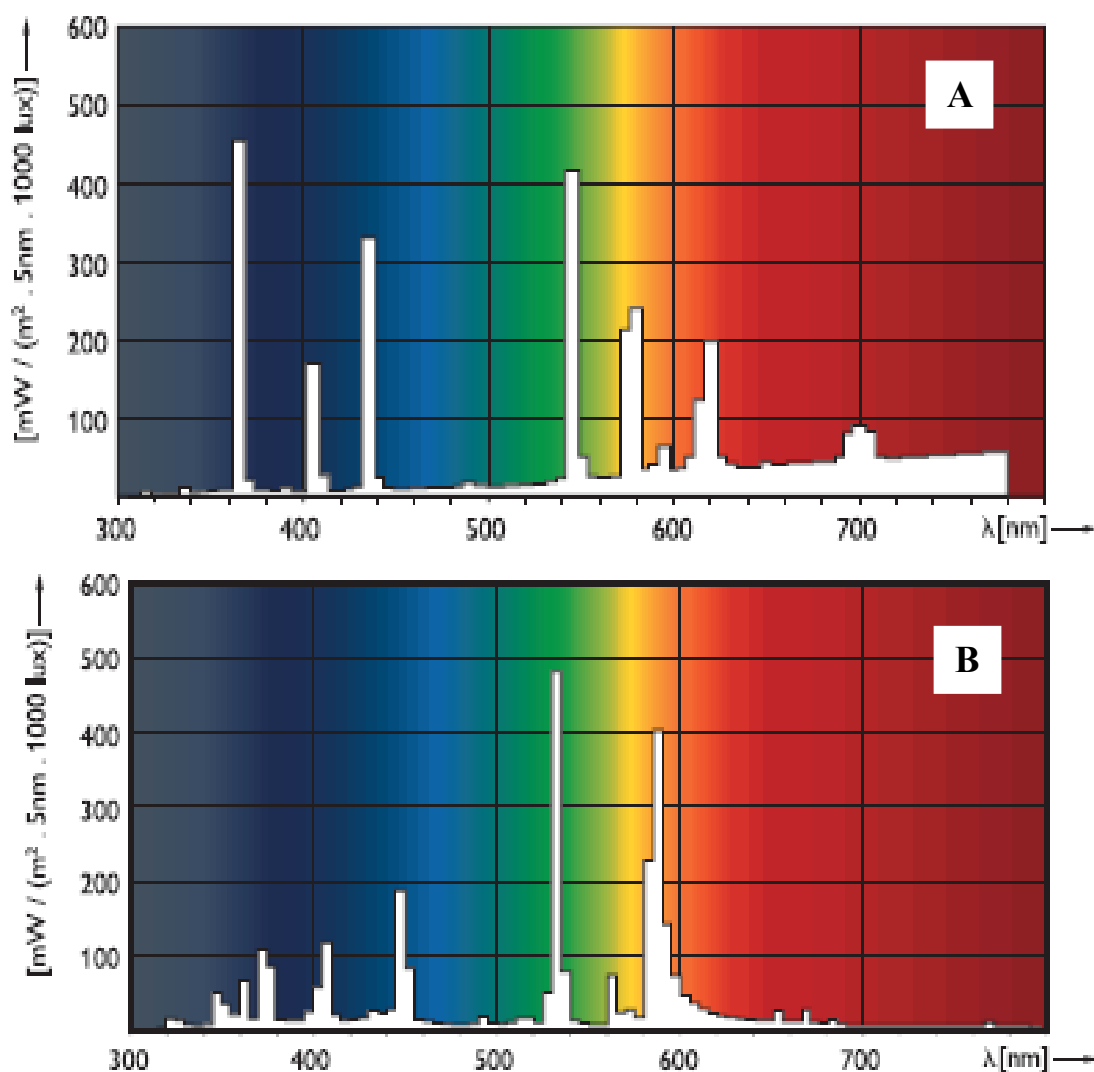

Fig. S1. Emission spectra of lamps. A) Mercury ( $L_{Hg}$ ). B) Metal halide ( $L_{MH}$ ).

Table S1. Properties of Hg lamp ( $L_{Hg}$ ) UV and metal halide lamp ( $L_{MH}$ )

| Lamp     | Total radiation ( $W.m^{-2}$ ) | UV radiation ( $W.m^{-2}$ ) | Visible radiation ( $W.m^{-2}$ ) | Total flux ( $photons.cm^{-2}.s^{-1}$ ) |
|----------|--------------------------------|-----------------------------|----------------------------------|-----------------------------------------|
| $L_{Hg}$ | 445.5                          | 82,9                        | 362.6                            | $1.23 \times 10^{17}$                   |
| $L_{MH}$ | 522.7                          | 70.2                        | 452.5                            | $1.44 \times 10^{17}$                   |

Table S2. Inorganic composition of carbon-based material from sewage sludge

| Element | Wavelength<br>(nm) | R <sup>2</sup> | Concentration (g/Kg of dry weight) |                    |
|---------|--------------------|----------------|------------------------------------|--------------------|
|         |                    |                | Sample <sup>a</sup>                | Ashes <sup>b</sup> |
| Ag      | 328.068            | 0.999          | 0.013                              | 0.072              |
| Al      | 396.152            | 0.999          | 24.91                              | 21.78              |
| B       | 249.678            | 0.999          | 0.900                              | 0.661              |
| Ba      | 493.408            | 0.999          | 0.406                              | 0.318              |
| Ca      | 422.67             | 0.999          | 79.13                              | 65.04              |
| Cr      | 267.716            | 0.999          | 0.304                              | 0.274              |
| Cu      | 327.395            | 0.999          | 0.593                              | 0.189              |
| Fe      | 248.33             | 0.999          | 83.34                              | 89.55              |
| K       | 766.49             | 0.997          | 19.94                              | 8.89               |
| Ga      | 417.204            | 0.999          | 0.040                              | ND <sup>c</sup>    |
| La      | 333.749            | 0.999          | 0.105                              | 0.090              |
| Li      | 610.365            | 0.999          | 0.205                              | 0.027              |
| Mg      | 280.270            | 0.999          | 5.37                               | 4.95               |
| Mn      | 259.372            | 0.999          | 0.469                              | 0.386              |
| Mo      | 202.032            | 0.999          | 0.072                              | 0.060              |
| Na      | 589.592            | 0.999          | 33.39                              | 0.471              |
| Ni      | 231.604            | 0.999          | 0.044                              | ND <sup>c</sup>    |
| P       | 213.618            | 0.999          | 28.34                              | 31.14              |
| Pb      | 182.143            | 0.999          | 0.054                              | ND <sup>c</sup>    |
| Sc      | 361.383            | 0.999          | 0.021                              | 0.037              |
| Si      | 288.158            | 0.998          | 45.86                              | ND <sup>c</sup>    |
| Sr      | 421.552            | 0.999          | 0.189                              | ND <sup>c</sup>    |
| Zn      | 213.857            | 0.999          | 0.538                              | 1.18               |

<sup>a</sup>Concentration in dry sample. <sup>b</sup>Concentration in ashes. <sup>c</sup>ND: not detected

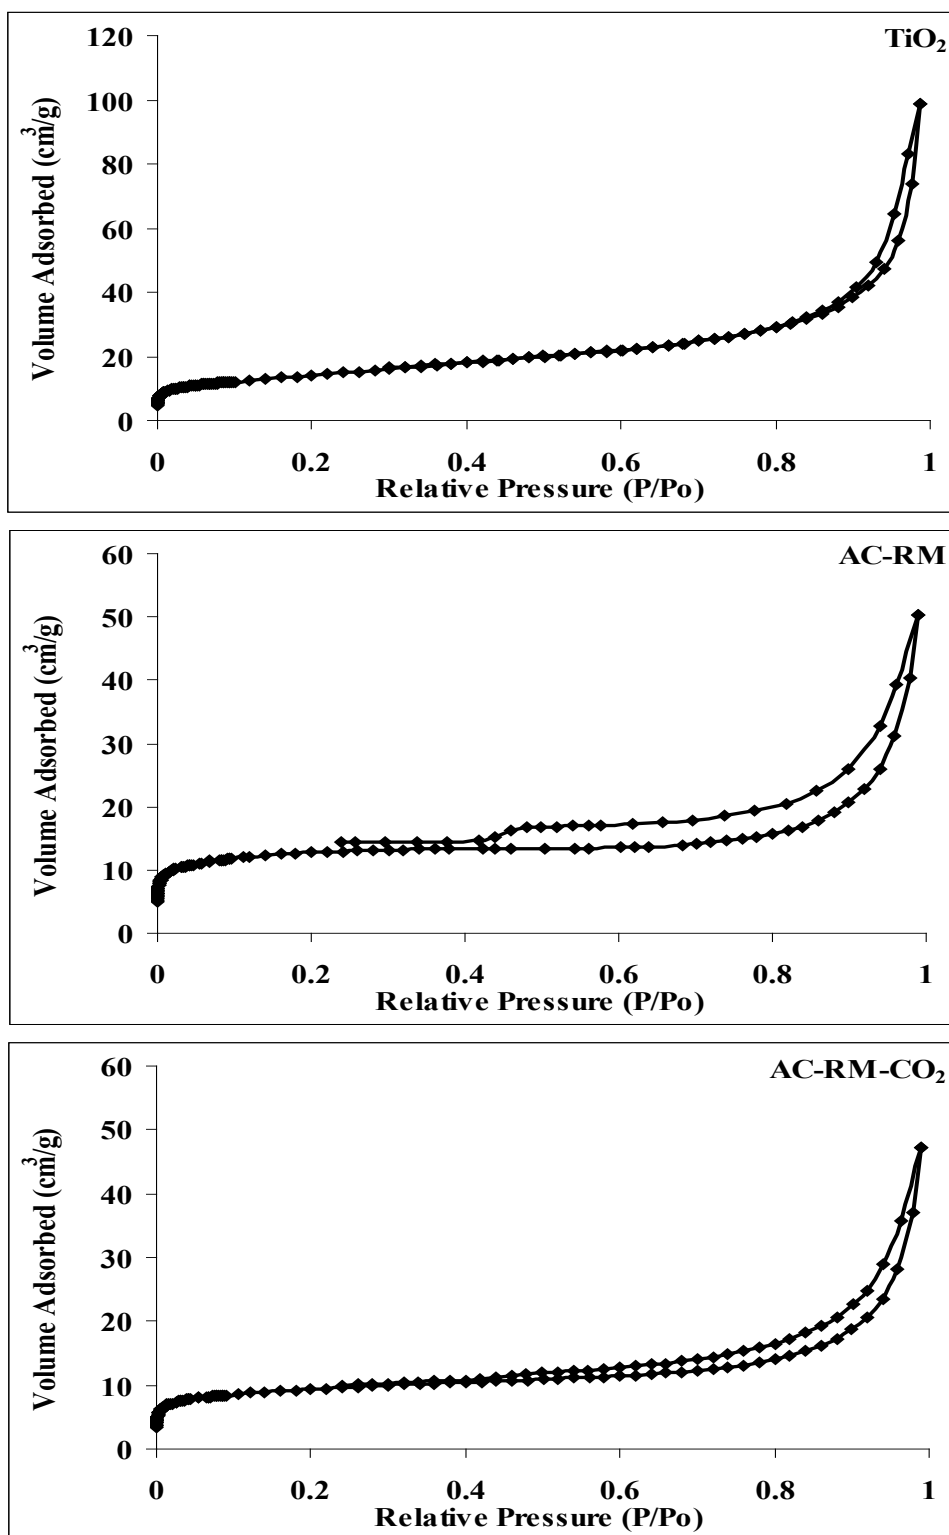

Fig. S2. Adsorption isotherm of TiO<sub>2</sub> P25, AC-RM and AC-RM-CO<sub>2</sub>

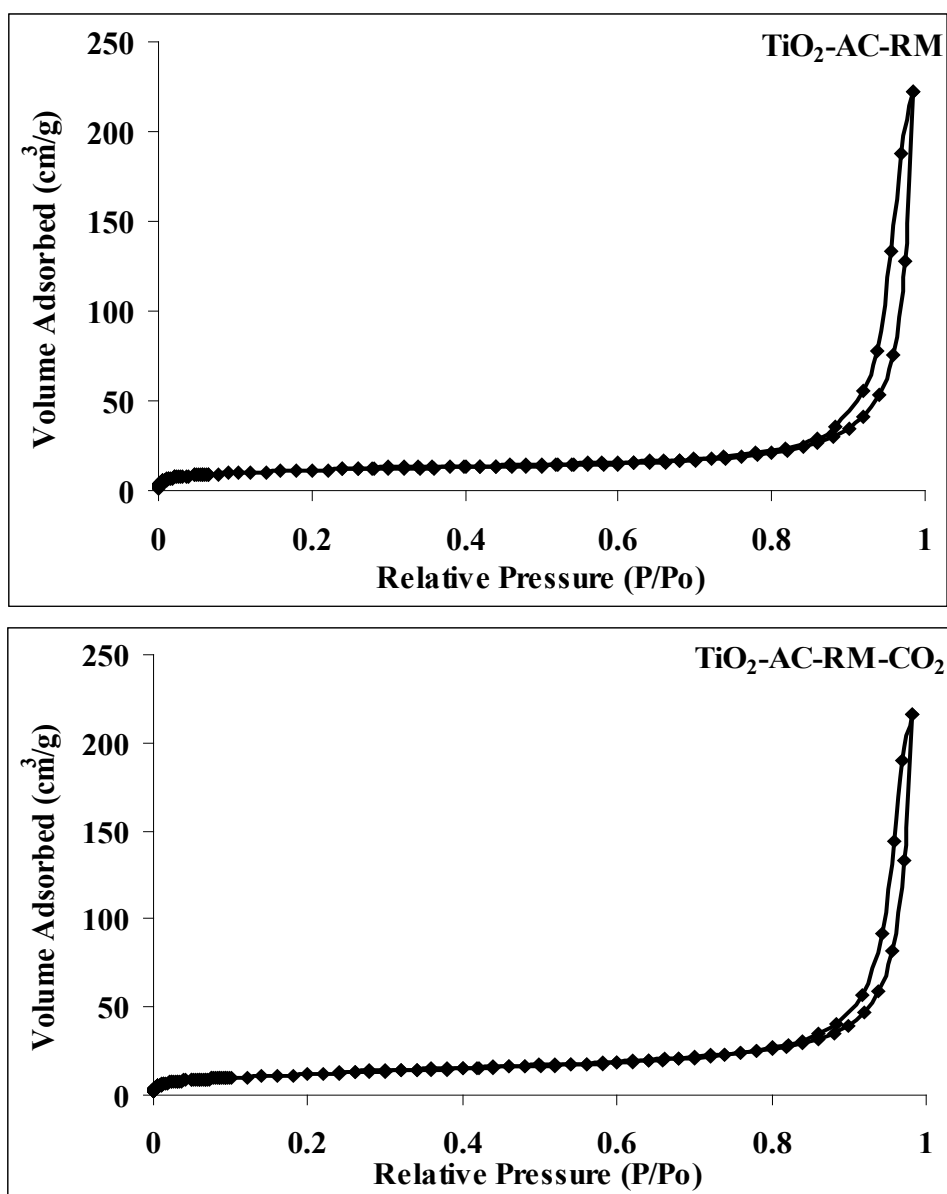

Fig. S3. Adsorption isotherm of TiO<sub>2</sub>-AC-RM and TiO<sub>2</sub>-AC-RM-CO<sub>2</sub>

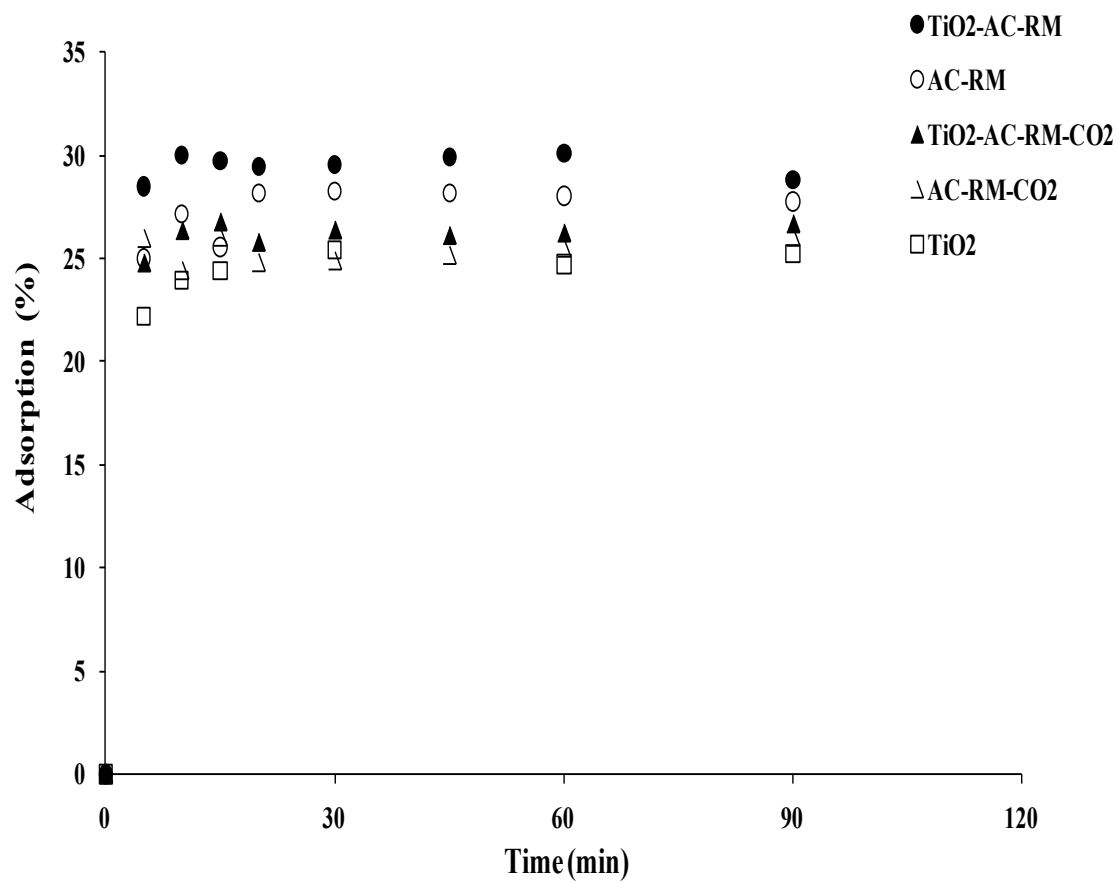

Fig. S4. Kinetics of MB adsorption in the dark.

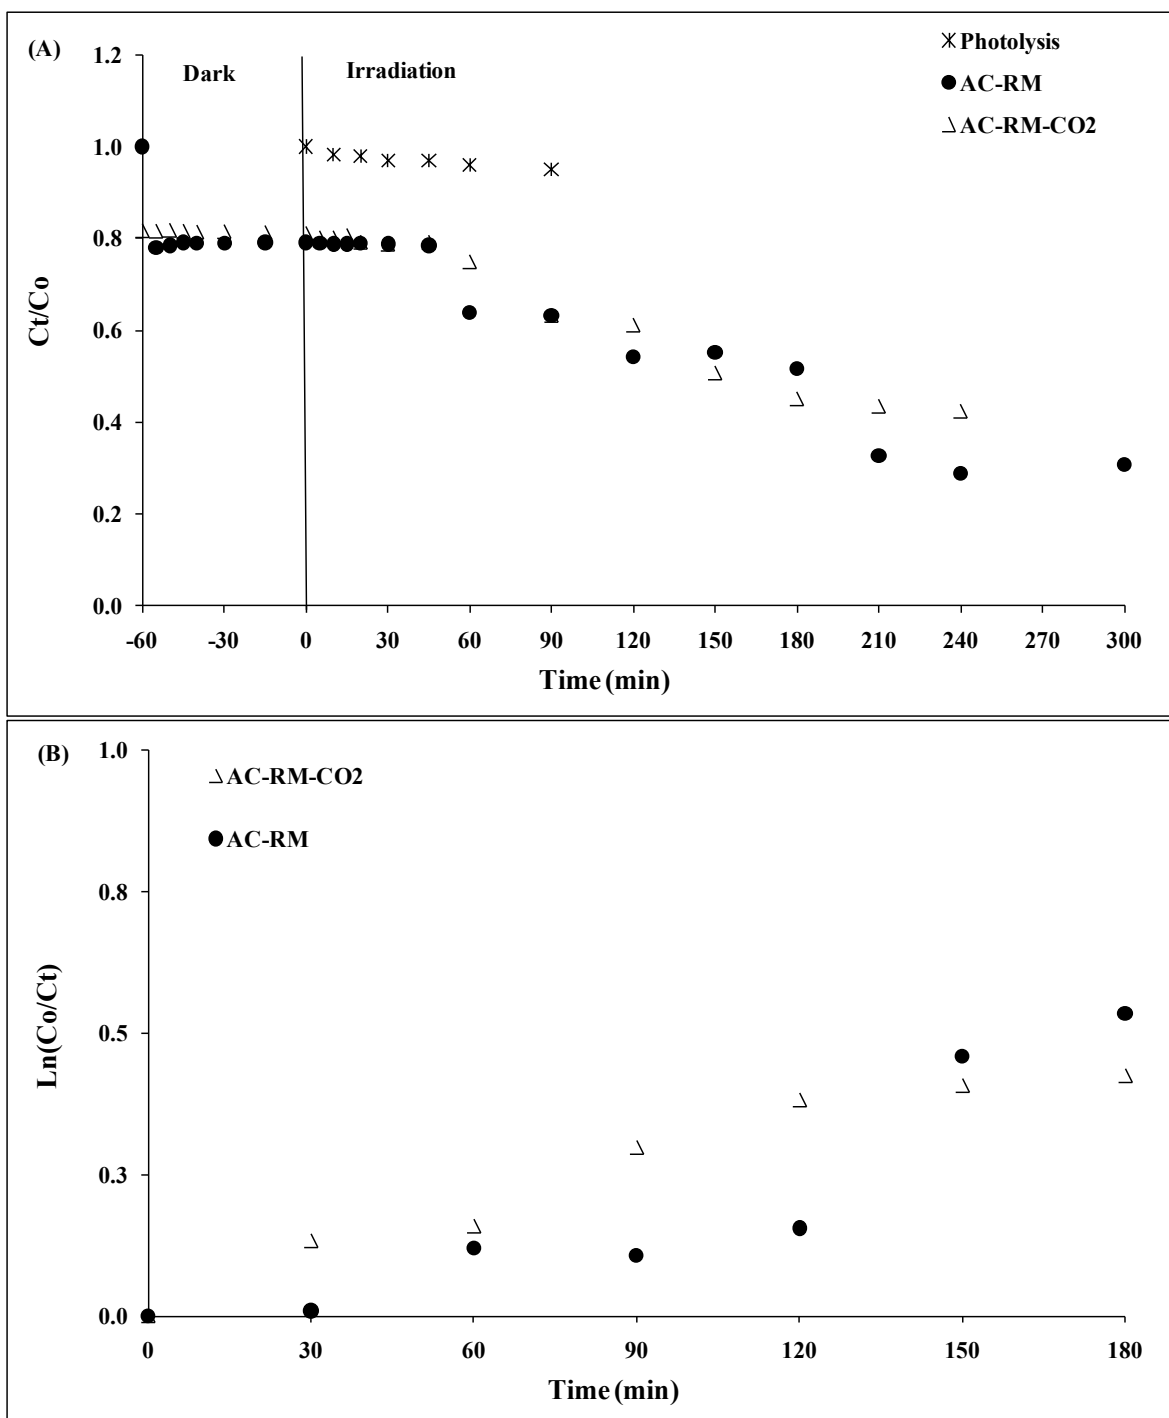

Fig. S5. Kinetic of disappearance of MB in absence of TiO<sub>2</sub> under Hg lamp (A). Linear regression estimated after 60min adsorption in the dark and 60min irradiation (B).

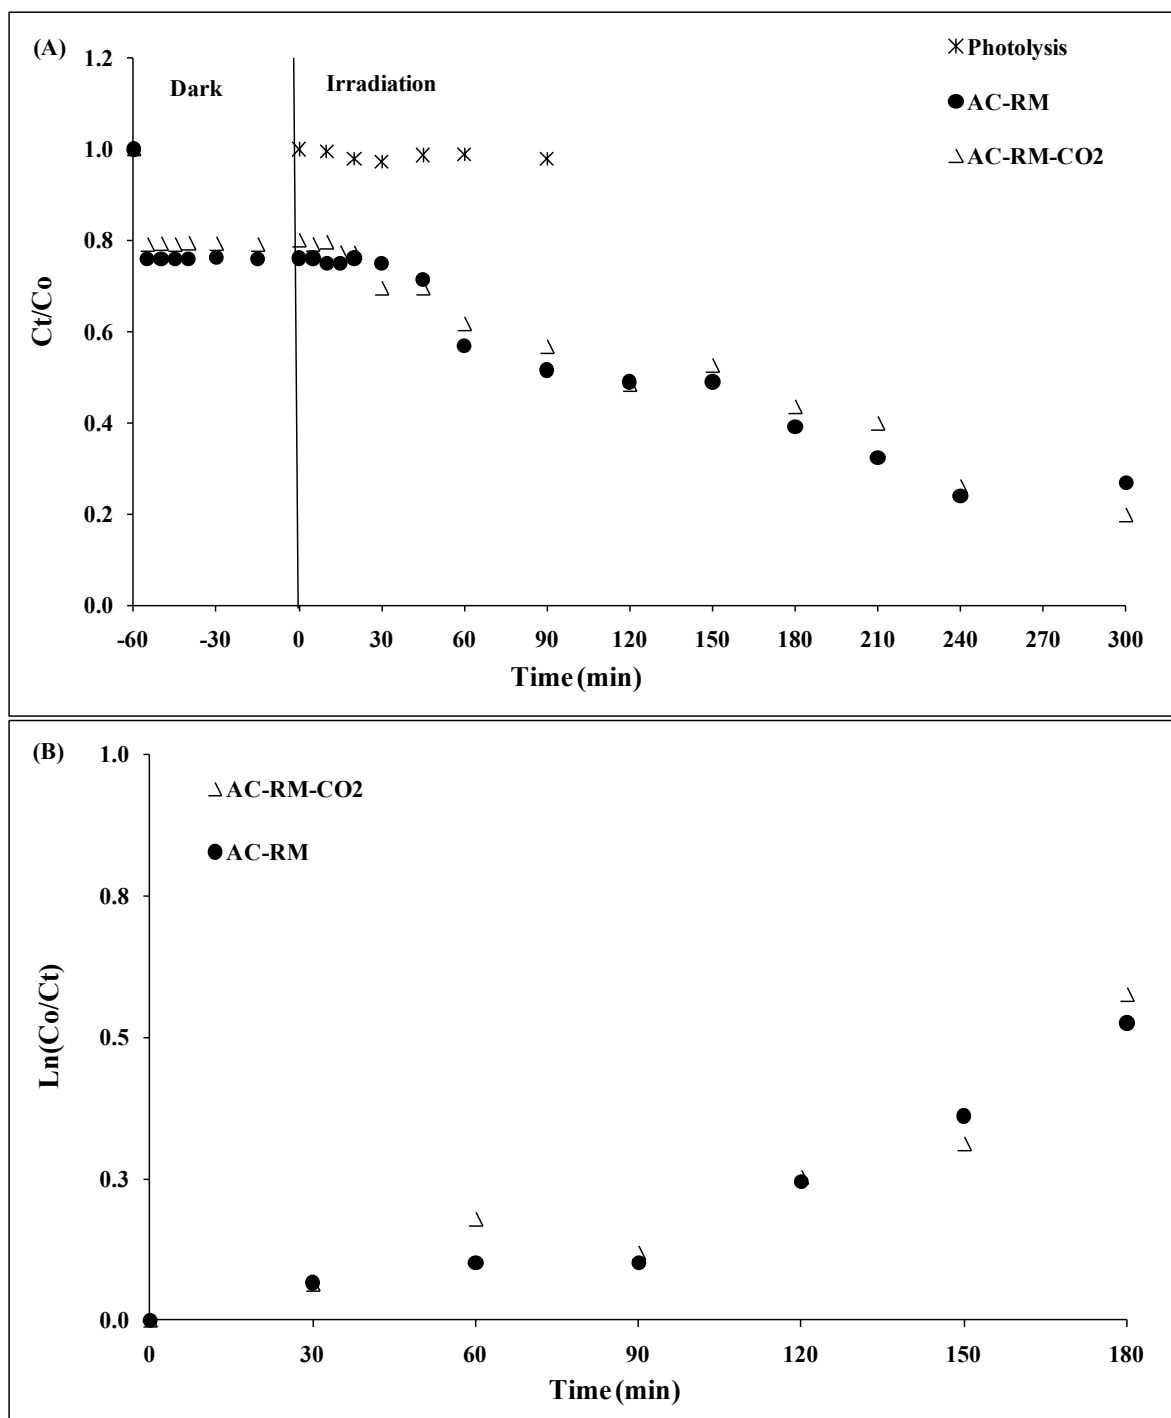

Fig. S6. Kinetic of disappearance of MB in absence of TiO<sub>2</sub> under MH lamp (A). Linear regression estimated after 60min adsorption in the dark and 60min irradiation (B).
